# Supplementary material for: Increased Risk of Dry Eye Disease After Gastrectomy : A Nationwide Cohort Study
Source: Research Square preprint supplement (doi:10.21203/rs.3.rs-7181785/v1), 2025-08-17
Supplement: Supplementary file 1 [file 62f1678ea8a503b3a3ac9a71.docx]

**S1** Crude and adjusted hazard ratios (95% confidence interval) of gastrectomy for dry eye with subgroup analyses according to age, sex, income, region, and CCI scores

|  | | N of event /  N of total (%) | Follow-up  duration (PY) | IR per  100  (PY) | IRD  (95% CI) | Hazard ratios for dry eye | | | |
| --- | --- | --- | --- | --- | --- | --- | --- | --- | --- |
| Crude | P-value | Adjusted model with OW † | P-value |
| Age < 60 years old (n = 8,625) | | | |  |  |  |  |  |  |
|  | Gastrectomy | 432 / 1,725 (25.04) | 9,162 | 4.72 | -0.18 (-0.68 to 0.32) | 1.02 (0.91-1.14) | 0.719 | 1.07 (0.98-1.17) | 0.131 |
|  | Control | 2,041 / 6,900 (29.58) | 41,683 | 4.90 |  | 1 |  | 1 |  |
| Age ≥ 60 years old (n = 6,805) | | | |  |  |  |  |  |  |
|  | Gastrectomy | 300 / 1,361 (22.04) | 4,757 | 6.31 | -0.22 (-1.01 to 0.57) | 1.00 (0.90-1.12) | 0.97 | 1.10 (1.01-1.20) | 0.034* |
|  | Control | 1,592 / 5,444 (29.24) | 24,390 | 6.53 |  | 1 |  | 1 |  |
| Male (n = 8,290) | | | |  |  |  |  |  |  |
|  | Gastrectomy | 492 / 1,658 (29.67) | 11,917 | 4.13 | 0.16 (-0.24 to 0.55) | 1.05 (0.95-1.16) | 0.351 | 1.15 (1.07-1.24) | <0.001* |
|  | Control | 2,169 / 6,632 (32.71) | 54,631 | 3.97 |  | 1 |  | 1 |  |
| Female (n = 3,440) | | | |  |  |  |  |  |  |
|  | Gastrectomy | 263 / 688 (38.23) | 5,038 | 5.22 | -0.33 (-1.05 to 0.38) | 0.94 (0.82-1.07) | 0.365 | 0.98 (0.88-1.09) | 0.741 |
|  | Control | 1,251 / 2,752 (45.46) | 22,530 | 5.55 |  | 1 |  | 1 |  |
| Low income group (n = 5,555) | | | |  |  |  |  |  |  |
|  | Gastrectomy | 350 / 1,111 (31.50) | 7,781 | 4.50 | 0.31 (-0.19 to 0.82) | 1.08 (0.97-1.22) | 0.173 | 1.20 (1.09-1.31) | <0.001* |
|  | Control | 1,523 / 4,444 (34.27) | 36,372 | 4.19 |  | 1 |  | 1 |  |
| High income group (n = 6,175) | | | |  |  |  |  |  |  |
|  | Gastrectomy | 405 / 1,235 (32.79) | 9,174 | 4.41 | -0.24 (-0.72 to 0.25) | 0.95 (0.85-1.06) | 0.347 | 1.01 (0.93-1.10) | 0.833 |
|  | Control | 1,897 / 4,940 (38.40) | 40,789 | 4.65 |  | 1 |  | 1 |  |
| Urban resident (n = 5,185) | | | |  |  |  |  |  |  |
|  | Gastrectomy | 348 / 1,037 (33.56) | 7,493 | 4.64 | 0.06 (-0.47 to 0.60) | 1.02 (0.91-1.15) | 0.726 | 1.14 (1.04-1.25) | 0.005* |
|  | Control | 1,566 / 4,148 (37.75) | 34,229 | 4.58 |  | 1 |  | 1 |  |
| Rural resident (n = 6,545) | | | |  |  |  |  |  |  |
|  | Gastrectomy | 407 / 1,309 (31.09) | 9,462 | 4.30 | -0.02 (-0.48 to 0.45) | 1.00 (0.90-1.11) | 1 | 1.05 (0.97-1.15) | 0.221 |
|  | Control | 1,854 / 5,236 (35.41) | 42,932 | 4.32 |  | 1 |  | 1 |  |
| CCI scores = 0 (n = 5,405) | | | |  |  |  |  |  |  |
|  | Gastrectomy | 2 / 9 (22.22) | 74 | 2.70 | -1.69 (-6.46 to 3.09) | 0.62 (0.15-2.46) | 0.495 | 0.60 (0.41-0.88) | 0.009* |
|  | Control | 2,005 / 5,396 (37.16) | 45,667 | 4.39 |  | 1 |  | 1 |  |
| CCI scores = 1 (n = 1,551) | | | |  |  |  |  |  |  |
|  | Gastrectomy | 3 / 13 (23.08) | 128 | 2.34 | -2.37 (-6.13 to 1.40) | 0.48 (0.15-1.50) | 0.206 | 0.69 (0.46-1.05) | 0.081 |
|  | Control | 606 / 1,538 (39.40) | 12,872 | 4.71 |  | 1 |  | 1 |  |
| CCI scores ≥ 2 (n = 4,774) | | | |  |  |  |  |  |  |
|  | Gastrectomy | 750 / 2,324 (32.27) | 16,753 | 4.48 | 0.14 (-0.31 to 0.57) | 1.01 (0.92-1.12) | 0.821 | 1.08 (0.96-1.20) | 0.196 |
|  | Control | 809 / 2,450 (33.02) | 18,622 | 4.34 |  | 1 |  | 1 |  |

Abbreviation: IR, incidence rate; IRD, incidence rate difference; PY. person-year; OW, overlap weighting;

* Significance at P < 0.05

† Adjusted for age, sex, income, and region of residence, and CCI scores
